# Supplementary material for: Machine Learning Reveals Time-Varying Microbial Predictors with Complex Effects on Glucose Regulation
Source: PubMed Central journal article supplement (PMC8573957; doi:10.1128/msystems.01191-20), 2021-02-16

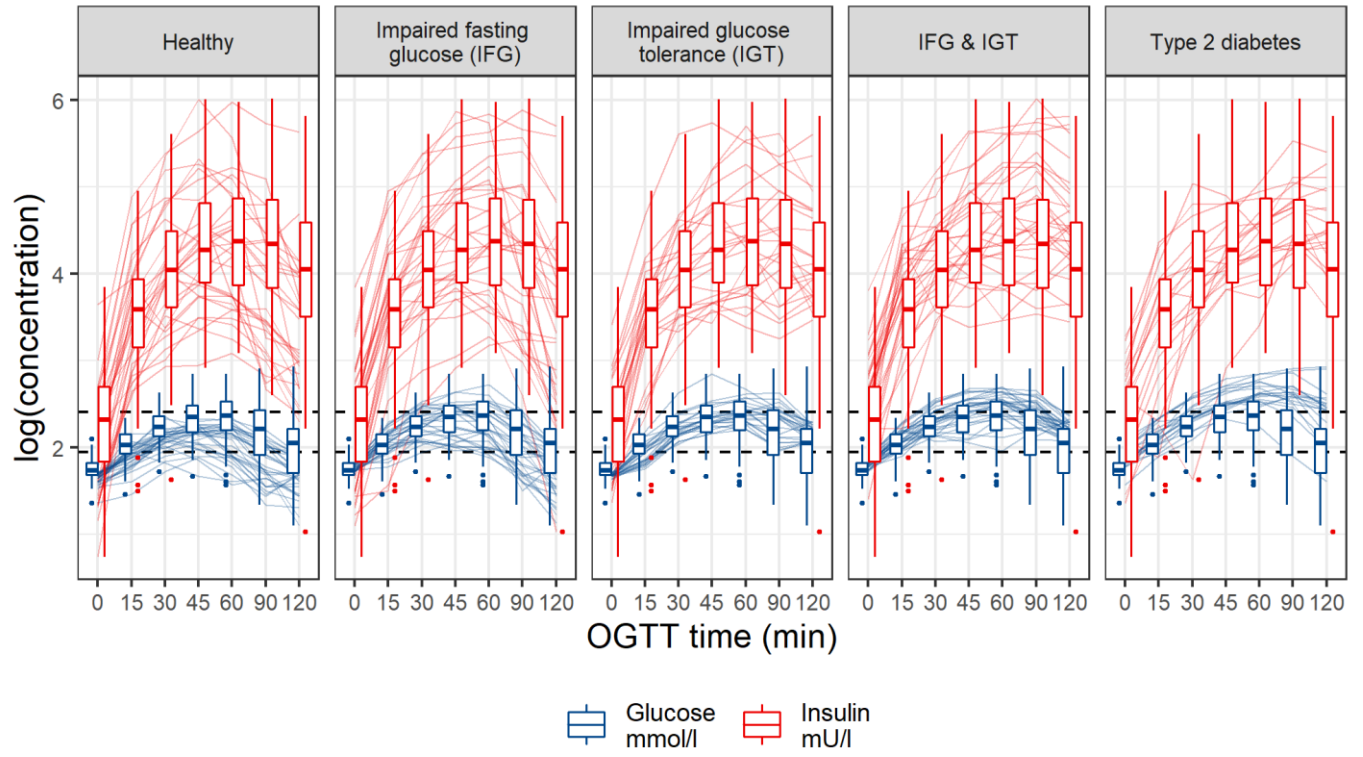

Supplement: msystems.01191-20-sf003.pdf [file msystems.01191-20-sf003.pdf]
